# Supplementary material
Source: HighWire-hosted journal article supplement (https://bmjophth.bmj.com/content/10/1/e001884)
Supplement: inline-supplementary-material-1 [file inline-supplementary-material-1.pdf]

**Supplemental Appendix 1: Participant questionnaire**

Date: \_\_\_\_\_  
Coded subject ID #: \_\_\_\_\_

### **Research Questionnaire**

1. How old are you? \_\_\_\_\_ years
  2. What is your sex?  
\_\_\_\_\_ male  
\_\_\_\_\_ female
  3. How tall are you now? \_\_\_\_\_ft \_\_\_\_\_inches
  4. How tall were you when you were 18? \_\_\_\_\_ft \_\_\_\_\_inches
  5. How much do you weigh now? \_\_\_\_\_ pounds
  6. How much did you weigh when you were 18? \_\_\_\_\_ pounds
- 

7. What is your race? (check all that apply)  
\_\_\_\_\_ White  
\_\_\_\_\_ Black or African American  
\_\_\_\_\_ Asian  
\_\_\_\_\_ American Indian or Alaskan Native  
\_\_\_\_\_ Native Hawaiian or Other Pacific Islander  
\_\_\_\_\_ Other (specify: \_\_\_\_\_)
  8. What is your ethnicity?  
\_\_\_\_\_ Hispanic or Latino  
\_\_\_\_\_ Not Hispanic or Latino
- 

9. Did you ever smoke tobacco? YES / NO
10. Do you currently smoke tobacco? YES / NO

*If YES to question 9 or 10:*

- a. What do/did you smoke?  
\_\_\_\_\_ cigarettes  
\_\_\_\_\_ e-cigarettes  
\_\_\_\_\_ cigars  
\_\_\_\_\_ pipe  
\_\_\_\_\_ other (specify: \_\_\_\_\_)
- b. How many years have you smoked? \_\_\_\_\_ years
- c. How much do/did you smoke (for example: packs per day)? \_\_\_\_\_

Date: \_\_\_\_\_

Coded subject ID #: \_\_\_\_\_

11. Do you have high blood pressure? YES / NO
12. Do you have age-related heart disease (for example: heart attack, heart failure, coronary artery disease, stents)? YES / NO

- 
13. Have you ever been diagnosed with diabetes? YES / NO

*If YES to question 13:*

- a. What type of diabetes do you have?

\_\_\_\_\_ Type 1

\_\_\_\_\_ Type 2

- b. How many years have you had diabetes?

\_\_\_\_\_ years

- c. Do you use insulin to control your diabetes?

YES / NO

- d. Have you been diagnosed with neuropathy (tingling or numbness in your hands or feet) due to diabetes?

YES / NO

- e. Do you have kidney disease due to diabetes?

YES / NO

- f. Do you have eye disease due to diabetes?

YES / NO

- g. Do you have trouble with your blood circulation due to diabetes?

YES / NO

- h. Have you had an amputation because of your diabetes?

YES / NO

- 
14. How often do you wear contact lenses?

ALWAYS / SOMETIMES / NEVER

15. How often do you wear glasses?

ALWAYS / SOMETIMES / NEVER

16. How often do you wear contact lenses, glasses or sunglasses outside?

ALWAYS / SOMETIMES / NEVER

17. How often do you wear a sun-blocking hat when outside?

ALWAYS / SOMETIMES / NEVER

Date: \_\_\_\_\_  
Coded subject ID #: \_\_\_\_\_

**18. Do any of your family members have Fuchs corneal dystrophy?**  
**YES / NO**

*If YES to question 18:*

- a. List the relationship to you of the family members with Fuchs corneal dystrophy (for example: mother, father, sister, etc)

\_\_\_\_\_  
\_\_\_\_\_

**19. Do any of your family members have macular degeneration?**  
**YES / NO**

*If YES to question 18:*

- a. List the relationship to you of the family members with macular degeneration (for example: mother, father, sister, etc)

\_\_\_\_\_  
\_\_\_\_\_

-----  
**FEMALES only**

**20. How old were you when you got your first period? \_\_\_\_\_ years**

**21. Have you ever been pregnant? YES / NO**

*If YES to question 21:*

- a. How many times have you been pregnant?

\_\_\_\_\_

- b. How many pregnancies were longer than 3 months? \_\_\_\_\_

- c. How old were you when you had your first pregnancy (that was longer than 3 months)?  
\_\_\_\_\_ years

- d. Did you breastfeed after pregnancy?

**YES / NO**

*If YES to question 21d:*

- i. How many total months (all babies combined) did you breastfeed?

\_\_\_\_\_

Date: \_\_\_\_\_

Coded subject ID #: \_\_\_\_\_

- 22. Have you ever used oral contraceptives (birth control pills) or other hormonal birth control methods? YES / NO**

*If YES to question 22:*

- e. How many years did you use these birth control methods? \_\_\_\_\_ years**

- 23. Have you reached menopause? YES / NO**

*If YES to question 23:*

- a. At what age was your last period? \_\_\_\_\_ years**

- b. Did you reach menopause naturally or after surgery?**

\_\_\_\_\_ naturally

\_\_\_\_\_ surgically with removal of:

\_\_\_\_\_ uterus (hysterectomy)

\_\_\_\_\_ ovaries (oophorectomy)

- 24. Did you ever take hormone replacement therapy? (estrogen and / or progesterone) YES / NO**

*If YES to question 24:*

- a. What kind of hormone replacement therapy?**

\_\_\_\_\_ estrogen only

\_\_\_\_\_ estrogen and progesterone

\_\_\_\_\_ unknown

- b. How long did you use hormone replacement therapy? \_\_\_\_\_ years**
